# Supplementary material for: Polysaccharide from Pleurotus nebrodensis induces apoptosis via a mitochondrial pathway in HepG2 cells
Source: Royal Society of Chemistry journal article supplement (doi:10.1039/c5fo00884k), 2015-09-29
Supplement: c5fo00884k1.pdf [file c5fo00884k1.pdf]

**Supplementary data for**

**Polysaccharide from *Pleurotus nebrodensis* induces  
apoptosis via mitochondrial pathway in HepG2 cells**

Haiyan Cui, Shufen Wu, Yanping Sun, Tiantian Wang, Zhenjing Li,

Mianhua Chen, Changlu Wang\*

---

\* Corresponding author (Changlu Wang).

Address:

Key Laboratory of Food Nutrition and Safety, Ministry of Education, School of Food Engineering  
and Biotechnology, Tianjin University of Science and Technology, Tianjin 300457, PR China

Tel: +86 22 -6027-2219

Fax: +86 22 -6027-2219

E-mail address: [clw123@tust.edu.cn](mailto:clw123@tust.edu.cn)

## Isolation and purification of PNA-2

Polysaccharides were isolated from fresh *P. nebrodensis* (1 kg) using alkaline extraction method, and then proteins were discarded by Sevage assay. Furthermore, polysaccharides were purified using a gel permeation chromatography column (60 × 2.6 cm) packed with Sepharose 2B gel. Three fractions (noted as PNA-1, PNA-2 and PNA-3, **Fig.S1**) were collected, freeze-dried, and then used for activity evaluation. PNA-2 showed higher inhibition rates than others (**Fig.S2**).

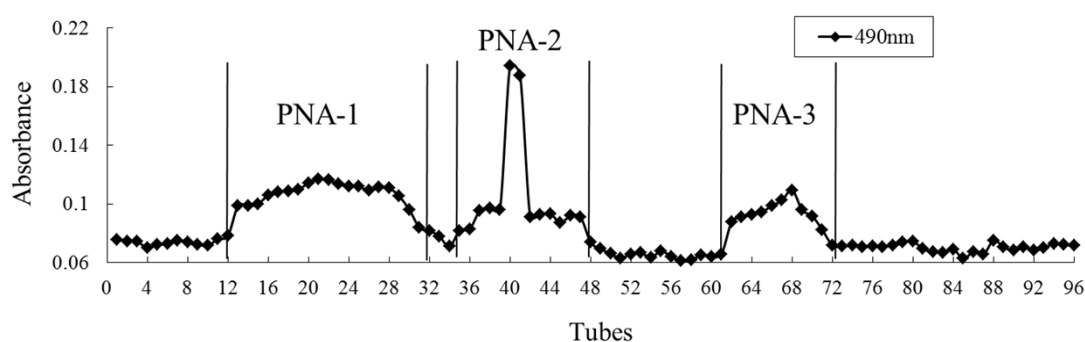

**Fig.S1** Elution pattern of the purified polysaccharide from a Sepharose 2B gel-permeation column.

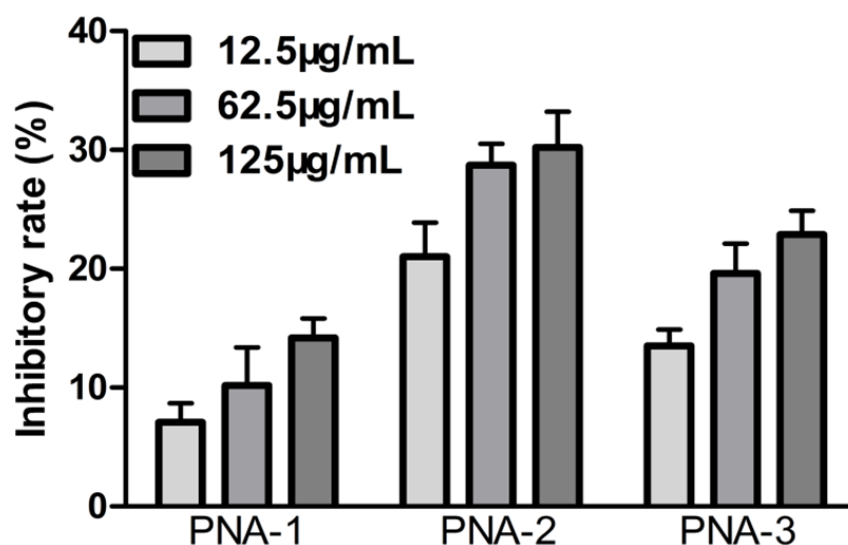

**Fig.S2** Effects of PNA on the viability of HepG2 cells at different concentrations (n = 6).

## Structural features of PNA-2

The molecular mass of PNA-2 was determined to be 37 kDa by HPLC and the percentage of total

sugar was determined to be 84.18% by the phenol–sulfuric acid method. The optical rotation was  $[\alpha] -17.86$  at RT (25 °C). The structural features of PNA-2 were further investigated by chemical and instrumental analyses, including fourier-transform infrared spectroscopy, high-performance liquid chromatography, gas chromatography, periodate oxidation, smith degradation, methylation analysis, and  $^{13}\text{C}$  and  $^1\text{H}$  nuclear magnetic resonance spectroscopy. Results revealed the structure of the repeating units of PNA-2 as follows (the article referenced has been submitted):

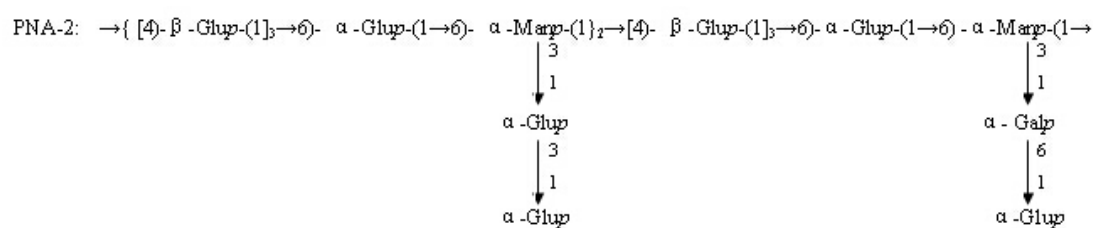

**Fig.S3** The structure of the repeating unit of PNA-2.
